# Supplementary material for: Centrosomal protein 55 activates NF-κB signalling and promotes pancreatic cancer cells aggressiveness
Source: PubMed Central journal article supplement (PMC5517556; doi:10.1038/s41598-017-06132-z), 2017-07-19
Supplement: 41598_2017_6132_MOESM1_ESM.pdf [file 41598_2017_6132_MOESM1_ESM.pdf]

Centrosomal protein 55 activates NF- $\kappa$ B signalling and promotes  
pancreatic cancer cells aggressiveness

Tao Peng<sup>1#</sup>, Wei Zhou<sup>1#</sup>, Feng Guo<sup>1</sup>, He-shui Wu<sup>1</sup>, Chun-you Wang<sup>1</sup>, Li Wang<sup>2\*</sup> &  
Zhi-yong Yang<sup>1\*</sup>

<sup>1</sup>Department of Pancreatic Surgery, Union Hospital, Tongji Medical College,  
Huazhong University of Science and Technology, 1277 Jiefang Avenue, Wuhan  
430022, China.

<sup>2</sup>Department of Emergency Surgery, Union Hospital, Tongji Medical College,  
Huazhong University of Science and Technology, 1277 Jiefang Avenue, Wuhan  
430022, China.

<sup>#</sup>These authors contributed equally to this work.

\*Correspondence and requests for materials should be addressed to Z.Y. (email:  
zhiyong\_yang134@163.com) and L.W. (email: huanhuan1229@163.com)

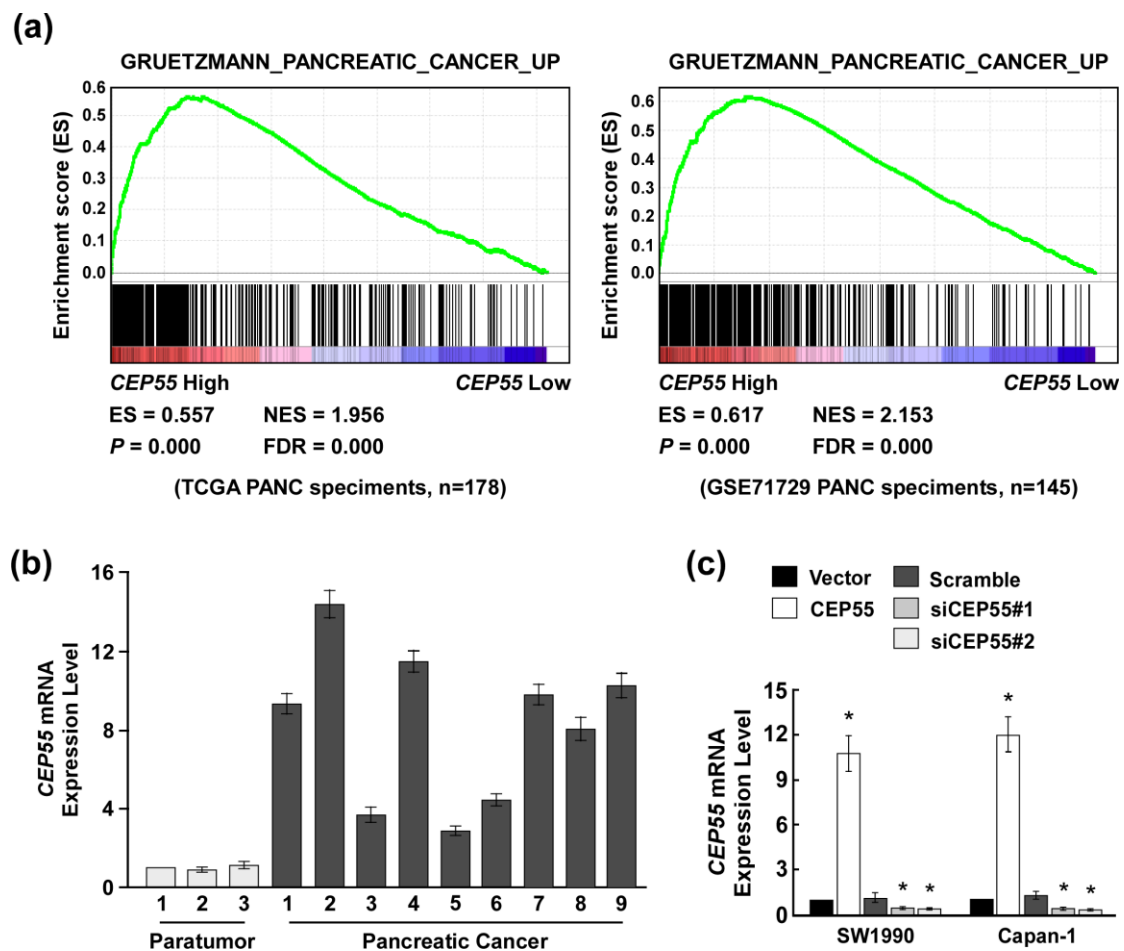

**Figure S1. Elevated *CEP55* mRNA expression in pancreatic cancer.**

(a) Gene set enrichment analysis (GSEA) plot indicating a significant correlation between *CEP55* mRNA expression level and those genes up-regulated in pancreatic cancer gene signatures (GRUETZMANN\_PANCREATIC\_CANCER\_UP; TCGA, n=178, GSE71729, n=145). (b) Quantitative real-time reverse transcription-PCR detection of *CEP55* mRNA in three normal pancreas tissues and nine pancreatic cancer tissues. (c) Expression of *CEP55* mRNA as detected by qRT-PCR analysis in SW1990 and Capan-1 cells upon transfection with *CEP55* or *CPE55* siRNAs. GAPDH was used as the loading control. Bars represent the mean  $\pm$  SD of three independent experiments. \* $P < 0.05$ .

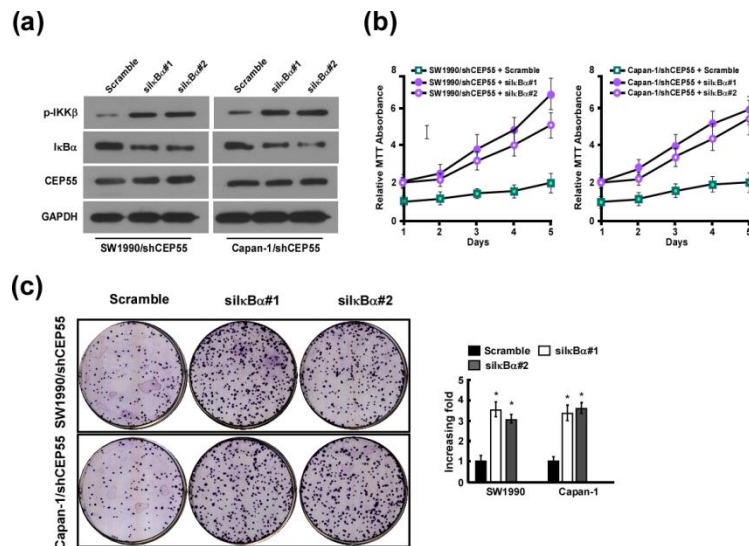

**Figure S2. NF- $\kappa$ B activation could partially rescue the reduced proliferation of PANC cells upon depletion of CEP55.**

(a) Western blotting analysis of p-IKK $\beta$  and I $\kappa$ B $\alpha$  expression in CEP55-downregulating SW1990 and Capan-1 cells upon transfection with siI $\kappa$ B $\alpha$ . (b) MTT assay of CEP55-downregulating SW1990 and Capan-1 cells transduced with siI $\kappa$ B $\alpha$ . (c) Representative micrographs (left panel) and quantification (right panel) of crystal violet-stained colonies of CEP55-knockdown SW1990 and Capan-1 cells transduced with siI $\kappa$ B $\alpha$  after 14 days of colony formation.

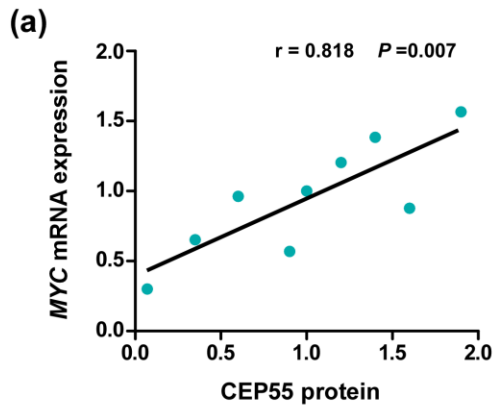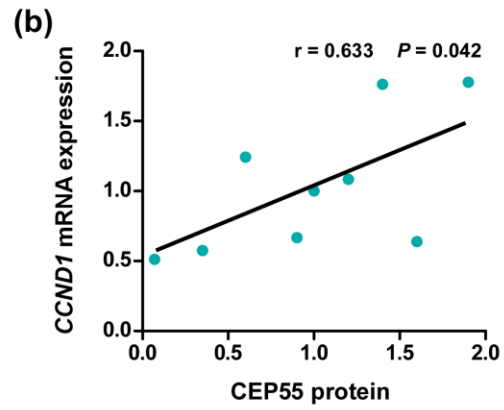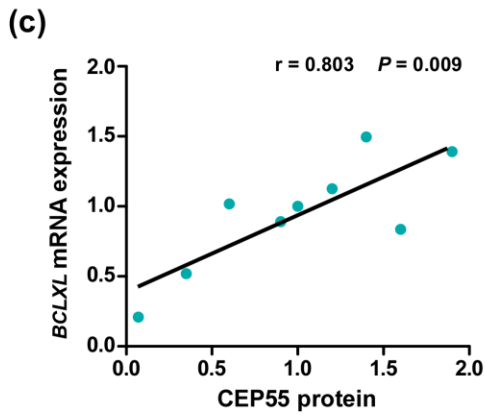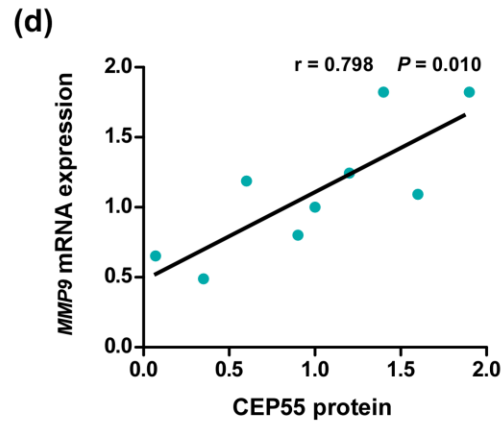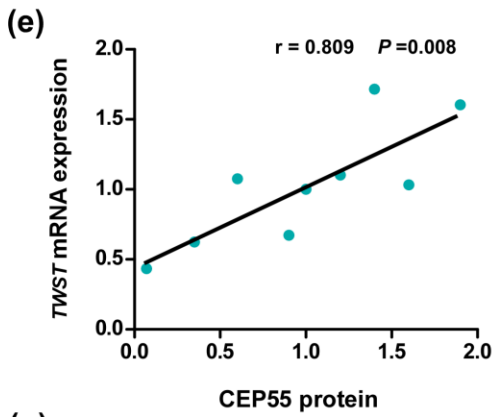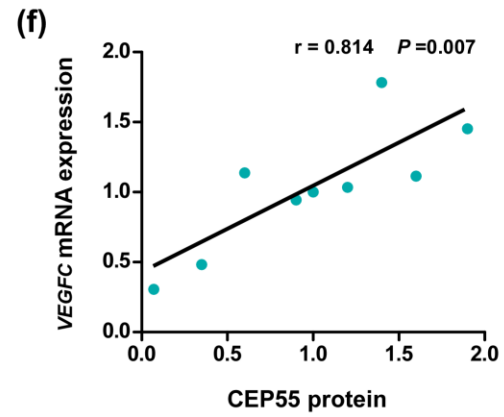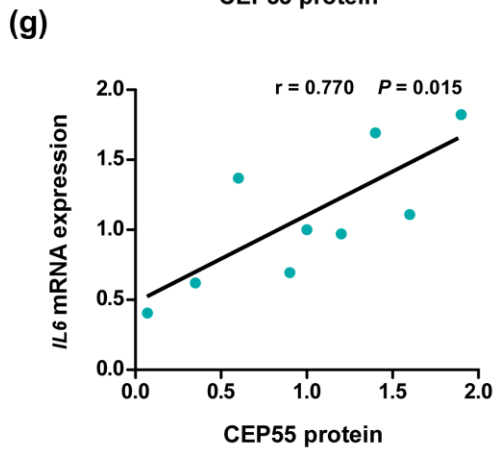

Figure S3. The Spearman correlation coefficient was calculated to assess the significance of association between CEP55 protein and NF- $\kappa$ B downstream targets in 9 PANC specimens. \* $P < 0.05$ .

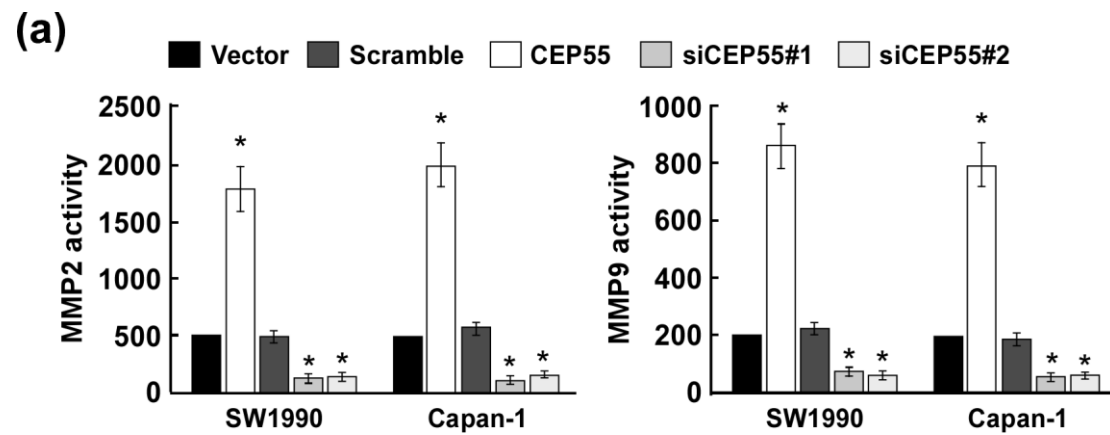

Figure S4. The activity of MMP2 and MMP9 in pancreatic cancer cells upon transfection with CEP55 or siCEP55.

**Table S1. Clinicopathological characteristics of PANC patient samples.**

| <b>Characteristics</b>     | <b>Number of cases</b> |
|----------------------------|------------------------|
| <b>Gender</b>              |                        |
| Male                       | 80                     |
| Female                     | 46                     |
| <b>Age(years)</b>          |                        |
| >57                        | 59                     |
| ≤57                        | 67                     |
| <b>Clinical Stage</b>      |                        |
| I                          | 47                     |
| II                         | 34                     |
| III                        | 34                     |
| IV                         | 11                     |
| <b>T classification</b>    |                        |
| T1                         | 25                     |
| T2                         | 47                     |
| T3                         | 34                     |
| T4                         | 20                     |
| <b>N classification</b>    |                        |
| N0                         | 81                     |
| N1                         | 45                     |
| <b>M classification</b>    |                        |
| M0                         | 115                    |
| M1                         | 11                     |
| <b>Expression of CEP55</b> |                        |
| Relatively high expression | 70                     |
| Relatively low expression  | 56                     |
| <b>Vital status</b>        |                        |
| Survive                    | 35                     |
| Mortality                  | 91                     |

**Table S2. Correlation between CEP55 Expression and Clinicopathologic Characteristics of Pancreatic Cancer Patient.**

| Characteristic                        | CEP55         |       | Chi-square     |
|---------------------------------------|---------------|-------|----------------|
|                                       | Protein level |       | test           |
|                                       | High          | Low   | <i>P</i> value |
| Age (> 57 versus ≤ 57 years)          | 32/38         | 27/29 | 0.858          |
| Gender (M versus F)                   | 48/22         | 32/24 | 0.198          |
| Clinical stage (I/II versus III/IV)   | 38/32         | 43/13 | 0.009          |
| T classification (T1/T2 versus T3/T4) | 34/36         | 38/18 | 0.032          |
| N classification (N0 versus N1)       | 39/31         | 42/14 | 0.027          |
| M classification (M0 versus M1)       | 60/10         | 55/1  | 0.022          |

**Table S3. Primers used for detecting genes expression.**

| <b>Gene</b>  | <b>Real-time PCR primer</b>                                      |
|--------------|------------------------------------------------------------------|
| <i>CEP55</i> | 5'- TTGGAACAAC AGATGCAGGC-3' and<br>5'- GAGTGCAGCAGTGGGACTTT -3' |
| <i>MYC</i>   | 5'-TCAAGAGGCGAACACACAAC-3' and<br>5'-GGCCTTTTCATTGTTTTCCA-3'     |
| <i>IL6</i>   | 5'-TCTCCACAAGCGCCTTCG-3' and<br>5'-CTCAGGGCTGAGATGCCG-3'         |
| <i>BCLXL</i> | 5'-TCCTTGTCTACGCTTTCCACG-3' and<br>5'-GGTCGCATTGTGGCCTTT-3'      |
| <i>VEGFC</i> | 5'-GTGTCCAGTGTAGATGAACTC-3' and<br>5'-ATCTGTAGACGGACACACATG-3'   |
| <i>MMP9</i>  | 5'-TTGGTCCACCTGGTTCAACT-3' and<br>5'-ACGACGTCTTCCAGTACCGA-3'     |
| <i>TWIST</i> | 5'-GGAGTCCGCAGTCTTACGAG-3' and<br>5'-TCTGGAGGACCTGGTAGAGG-3'     |
| <i>CCND1</i> | 5'-AACTACCTGGACCGCTTCCT-3' and<br>5'-CCACTTGAGCTTGTTACCA-3'      |
| <i>GAPDH</i> | 5'-ATTCCACCCATGGCAAATTC-3' and<br>5'-TGGGATTTCCATTGATGACAAG-3'   |
